# Supplementary material for: First Fleet: Another Byte of the Apple
Source: Royal Society of Chemistry journal article supplement (doi:10.1039/d3nr05611b), 2000-01-01
Supplement: d3nr05611b1.xlsx [file d3nr05611b1.xlsx]

## Sheet: Table S1
Table S1. Overview of studied 2D free-standing OSN membranes for methanol separation in the literature, which are provided in Figures 8, 10, 11, and 13. 2D nanomaterial-based membrane studies are categorized according to different colors, namely MXene (brown), GO (red), COF (blue), MoS2 (purple), BN (pink), others (green), and nanocomposites (black). A total of 60 different studies are included. …
Number	Article Title	Authors	Article Details	Free standing 2D-membrane	Solute/particle	Permeance (LMH/bar) (with/without solute)	Rejection (%)	MW of solute (g/mol)
1	A Regularly Channeled Lamellar Membrane for Unparalleled Water and Organics Permeation	J. Wang, P. Chen, B. Shi, W. Guo, M. Jaroniec, S.-Z. Qiao	Angew. Chem. Int. Ed. 2018, 57, 6814 –6818	MXene (Ti3C2Tx) on PDA support with thickness of 230 nm	-----	----/3563	----	----
				MXene (Ti3C2Tx) on PDA support with thickness of 470 nm	-----	----/2000	----	----
2	Two-dimensional Graphene Oxide/MXene Composite Lamellar Membranes for Efficient Solvent Permeation and Molecular Separation	S. Wei, Y. Xie, Y. Xing, L. Wang, H. Ye, X. Xiong, S. Wang, K. Han	Journal of Membrane Science 2019, 582, 414–422	MXene on nylon support	Methylene blue (MB)	1800/1800	----	319.85
3	Crumpled Two-Dimensional Ti3C2Tx MXene Lamellar Membranes for Solvent Permeation and Separation	Yidan Xing, Germain Akonkwa, Zhao Liu, Hongqi Ye, Kai Han	ACS Appl. Nano Mater. 2020, 3, 2, 1526–1534	Crumpled Ti3C2Tx (c-Ti3C2Tx) membrane x membranes at a mass loading of 0.1 mg/cm2 - nylon support (0.5 bar)	-----	----/2484	-----	-----
				Ti3C2Tx membrane x membranes at a mass loading of 0.1 mg/cm2 - nylon support (0.5 bar)	-----	----/121	-----	-----
				Crumpled Ti3C2Tx (c-Ti3C2Tx) membrane x membranes at a mass loading of 0.25 mg/cm2 - nylon support (0.5 bar)	-----	/1089	-----	-----
				Ti3C2Tx membrane x membranes at a mass loading of 0.25 mg/cm2 - nylon support (0.5 bar)		----/32	-----	-----
4	Elucidating Ultrafast Molecular Permeation through Well-Defined 2D Nanochannels of Lamellar Membranes	X. Wu, X. Cui, W. Wu, J. Wang, Y. Li, and Z. Jiang	Angew. Chem. 2019, 58, 18524 –18529	Ti3C2Tx on nylon support	-----	---/3029	-----	-----
				Ti3C2Tx-NH2 on nylon support	-----	---/2328	-----	-----
				Ti3C2Tx-C6H5 on nylon support	-----	---/907	-----	-----
				Ti3C2Tx-C12H25 on nylon support	-----	---/800	-----	-----
5	Enhancing Interfacial Adhesion of MXene Nanofiltration Membranes via Pillaring Carbon Nanotubes for Pressure and Solvent Stable Molecular Sieving	D.-D. Shao, Q. Zhang, L. Wang, Z.-Y. Wang, Y.-X. Jing, X.-L. Cao, F. Zhang, S.-P. Sun	Journal of Membrane Science 2021, 626,119033	MXene	-----	…./28	-----	-----
6*	Molecular Simulation Study of 2D MXene Membranes for Organic Solvent Nanofiltration	Jie Liu, Zitong Zhao, Lin Li, Yongsheng Wu, Haokang He	Journal of Membrane Science 2023, 677, 121623	Ti3C2O2 having d-spacing 0.9 nm	Nile red (NR)	../70.2	100	318
				Ti3C2O2 having d-spacing 1.45 nm	Nile red (NR)	.../23800	100	318
				Ti3C2O2 having d-spacing 2.0 nm	Nile red (NR)	.../101000	90	318
				Ti3C2O2 having d-spacing 2.5 nm	Nile red (NR)	.../289000	84	318
7	High-Performance and Stable Two-Dimensional MXene-Polyethyleneimine Composite Lamellar Membranes for Molecular Separation	Zhang Y, Chen D, Li N, Xu Q, Li H, He J, Lu J	ACS Applied Materials & Interfaces 2022, 14(8), 10237-45	MXene-PEI prepared at pH = 2	-----	…./187	-----	-----
				MXene-PEI prepared at pH = 10	-----	…./250	-----	-----
8	Realizing Small-Flake Graphene Oxide Membranes for Ultrafast Size-Dependent Organic Solvent Nanofiltration	L. Nie, K. Goh, Y. Wang, J. Lee, Y. Huang, H. E. Karahan, K. Zhou, M. D. Guiver, T.-H. Bae	Science Advances 2020, 6, eaaz9184	Small-flake graphene oxide (SFGO) cross-linked with La3+	------	----/120	----	----
				Large-flake graphene oxide (LFGO) cross-linked with La3+	------	----/45	----	----
				Large-flake graphene oxide (LFGO) cross-linked with Co3+	------	----/12	----	----
				Large-flake graphene oxide (LFGO) uncross-linked	------	----/12	----	----
				Small-flake graphene oxide (SFGO) cross-linked with La3+	Methyl orange (MO)	90/----	43	327.33
					Crystal violet (CV)	92/----	9	407.98
					Acid fuchsin (AF)	98/----	95	585.53
					Acid red 94 (AR)	108/----	96	1017.63
					Alcian blue (AB)	98/----	100	1298.86
				Large-flake graphene oxide (LFGO) cross-linked with La3+	Acid fuchsin (AF)	32/----	97	585.53
					Acid red 94 (AR)	42/----	98	1017.63
					Alcian blue (AB)	32/----	100	1298.86
9	Reduced Graphene Oxide Membranes for Ultrafast Organic Solvent Nanofiltration	L. Huang , J. Chen , T. Gao , M. Zhang , Y. Li , L. Dai, L. Qu, G. Shi	Advanced Materials 2016, 28, 8669–8674	S-rGO-18 on nylon support (solvent solvated reduced GO)	Basic fuchsine (BF)	76.9/78	0	337.86
					Methylene blue (MB)	77.2/78	0	319.85
					Brilliant yellow (BY)	76.0/78	86.2	961
					Evans blue (EB)	75.3/78	100	960.8
				HPEI/S-rGO-18 on nylon support (solvent solvated reduced GO)	Basic fuchsine (BF)	74.2/----	88.5	337.86
					Methylene blue (MB)	72.5/----	90	319.85
					Brilliant yellow (BY)	75.0/----	0	961
					Evans blue (EB)	75.3/----	100	960.8
10	Ultrathin Graphene-based Membrane with Precise Molecular Sieving and Ultrafast Solvent Permeation	Q. Yang, Y. Su, C. Chi, C. T. Cherian, K. Huang, V. G. Kravets, F. C.Wang, J. C. Zhang, A. Pratt, A. N. Grigorenko, F. Guinea, A. K. Geim, R. R. Nair	Nature Materials, 2017, 16, 1198–1202	HLGO (highly laminated large flake) on anodisc alumina support	-----	----/9.6	-----	-----
					Chrysoidine G (CG)	6.9/9.6	99.9	248
					Disperse red (DR)	6.6/9.6	99.9	314
					Methylene blue (MB)	6.3/9.6	99.9	319.85
					Rose bengal (RB)	7.1/9.6	99.9	1017.6
					Crystal violet (CV)	6.5/9.6	99.9	407.98
					Brilliant blue (BB)	6.6/9.6	99.9	792.85
11	Correlating Interlayer Spacing and Separation Capability of Graphene Oxide Membranes in Organic Solvents	S. Zheng, Q. Tu, M. Wang, J. Urban, B. Mi	ACS Nano 2020, 14, 6013-6023	Layer-stacked GO membrane on nylon support	Methylene blue (MB)	----/3.5	71.4	319.85
					Rhodamine B (RB)	----/3.5	80.6	479.02
12	Enhanced Stability and Separation Efficiency of Graphene Oxide Membranes in Organic Solvent Nanofiltration	Tiantian Gao, Haibo Wu, Lei Tao, Liangti Qu, Chun Li	J. Mater. Chem. A, 2018, 6, 19563-19569	GO on the nylon MF membrane (mass loading of 44 mg/m2)	Evans Blue (EB)	4.5/4.8	92.5	960.8
					Acid Fuchsin (AF)	4.5/4.8	75.7	585.53
				GO on the nylon MF membrane (mass loading of 68 mg/m2)	-----	----/2.3	----	----
				GO on the nylon MF membrane (mass loading of 91 mg/m2)	-----	----/1.2	----	----
13	Graphene Membranes with Tuneable Nanochannels by Intercalating Self-Assembled Porphyrin Molecules for Organic Solvent Nanofiltration	Tiantian Gao, Liang Huang, Chun Li, Guochuang Xu and Gaoquan Shi	Carbon, 2017, 124, 263-270	rGO on the nylon or AAO MF membrane (mass loading of 44 mg/m2)	Evans Blue (EB)	----/1.62	>99.9	960.8
					Acid Fuchsin (AF)	----/1.62	94.5	585.53
					Brilliant Yellow (BY)	----/1.62	96.8	961
				rGO-TMPyP (weight ratio of TMPyP to rGO:0.6) (44 mg/m2)	Evans Blue (EB)	----/5.26	>99.9	960.8
					Acid Fuchsin (AF)	----/5.26	92.2	585.53
					Brilliant Yellow (BY)	----/5.26	94.6	961
					Vitamin B12 (VB12)	----/4.4	91	1344
14	Solvent Transport Behavior of Shear Aligned Graphene Oxide Membranes and Implications in Organic Solvent Nanofiltration	A. Akbari, S. Meragawi, S. Martin, B. Corry, E. Shamsaei, C. Easton, D. Bhattacharyya, M. Majumder	ACS Appl. Mater. Interfaces 2018, 10, 2067−2074	Shear-aligned Nylon support GO membrane with 350±20 nm thickness	-----	----/108	-----	-----
15	Graphene Oxide Membranes on Ceramic Hollow Fibers – Microstructural Stability and Nanofiltration Performance	N. Aba, J. Chong, B. Wang, C. Mattevi, K. Li	Journal of Membrane Science 2015, 484, 87-94	GO hollow fiber membranes on ceramic substrate 1.5 μm thick - fresh	-----	---/3.97	>97	327.33
16	Leaf-veins-inspired Nickel Phosphate Nanotubes-Reduced Graphene Oxide Composite Membranes for Ultrafast Organic Solvent Nanofiltration	L. Zhang, J.Wang, Y. Zhang, J. Zhu, J. Yang, J. Wang, Y. Zhang, Y. Wang	Journal of Membrane Science 2022, 649, 120401	GO	Reactive black (ReB)	…/1.35	100	992
					Direct red (DR)	…/1.35	100	814
				Hydrothermal-GO	Reactive black (RB)	…/3	99.5	992
					Direct red (DR)	…/3	99	814
17	The Tripartite Role of 2D Covalent Organic Frameworks in Graphene-based Organic Solvent Nanofiltration Membranes	Xiao Sui, Yu Wang, Fei Liu, Ziwen Yuan, Cheng Wang, Yanxi Yu, Kun Zhou, Kunli Goh, Yuan Chen	Matter 2021, 4, 2953–2969	rGO	Brilliant blue G (BBG)	.../28	87	854
					Rhodamine B (RhB)	.../28	79	479
					Rose Bengal (RoB)	.../28	85.4	1018
					Methylene blue (MB)	.../28	78	320
					Acid orange 7 (AO7)	.../28	71.5	350
18	Functionalized Graphene Oxide-based Lamellar Membranes for Organic Solvent Nanofiltration Applications	A. H. Jatoi, K. H. Kim, M. A. Khan, F. H. Memon, M. Iqbal, D. Janwery, S. N. Phulpoto, A. Samantasinghar, K. H. Choi, K. H. Thebo	RSC Advances 2023, 13, 12695-12702	GO	Rhodamine B (RhB)	4/11.0	98	479
					Methylene blue (MB)	3/11.0	97	320
					Fuchsin acid (FA)	6/11.0	89	585
					Evans blue (EB)	2/11.0	91	960
19	Laminar HNb3O8-based Membranes Supported on Anodic Aluminum Oxide with Enhanced Anti-swelling Property for Organic Solvent Nanofiltration	K. Nakagawa, M. Kunimatsu, K. Yasui, T. Yoshioka, T. Shintani, E. Kamio, K.-L. Tung, S. C. E. Tsang, H. Matsuyama	Journal of Membrane Science, 2021, 640, 119799	GO/AAO	Acid red 265 (AR265)	.../8.1	8	635.6
					Evans blue (EB)	.../8.1	60	960
20	Molecular Size-Dependent Subcontinuum Solvent Permeation and Ultrafast Nanofiltration Across Nanoporous Graphene Membranes	Chi Cheng, Sathvik Ajay Iyengar, Rohit Karnik	Nature Nanotechnology 2021, 16 (9), 989-995	Defect-sealed nanoporous graphene	Rose Bengal (RoB)	.../170.7	97.3	1018
21	Ultrafast Aquaporin-like Multi-functionalized Holey Graphene Membrane with Tripartite Nanochannels for Organic Solvent Nanofiltration	Hegab HM, Ouda M, Kallem P, Aubry C, Ibrahim Y, Banat F, Hasan SW	Chemical Engineering Journal 2022, 450, 138033	Holey graphene multi-functionalized with SiO2 nanoparticle	Methylene blue (MB)	…/299	48	320
					Methyl orange (MO)	…/299	77.6	327
					Rhodamine B (RhB)	…/299	92.4	479
					Congo red (CR)	…/299	95.6	696.6
22	Microwave-assisted Design of Nanoporous Graphene Membrane for Ultrafast and Switchable Organic Solvent Nanofiltration	Kang J, Ko Y, Kim JP, Kim JY, Kim J, Kwon O, Kim KC, Kim DW	Nature Communications 2023, 14(1), 901	Microwave-treated nanoporous graphene membrane (MNG)	Methylene blue (MB)	…/5800	5	320
					Rhodamine B (RhB)	----/----	4	479
					Congo red (CR)	----/----	92	696.6
					Methyl blue (MlB)	----/----	99	799.8
					Evans Blue (EB)	----/----	97	960
23**	Organic Solvent Permeation through Negatively Charged Graphene Oxide Membranes	M. Dahanayaka M, J.-W. Chew	ACS Sustainable Chemistry Engineering 2022, 10(4), 1499-508	GO membranes	-----	…/1270	-----	-----
24	Controlling Assembly Behaviors of Laminar GO Membranes in Organic Solvents by Altering GO-solvent Interactions	Zhang M, Li P, Li M, Zheng W, Xie G, Xu X, Liu C, Jia J	Journal of Membrane Science 2021, 640, 119841	GO-DMSO	Methylene blue (MB)	74/74	86	319.85
					Rhodamine B (RhB)	68/74	90	479
					Acid Fuchsin (AF)	68/74	95	585
					Evans Blue (EB)	65/74	98	960
					Acid red 94 (AR)	66/74	99	1018
				GO-NMF	Methylene blue (MB)	52/52	89	319.85
					Rhodamine B (RhB)	49/52	93	479
					Acid Fuchsin (AF)	50/52	98	585
					Evans Blue (EB)	50/52	99	960
					Acid red 94 (AR)	46/52	99.8	1018
				GO-DMF	Methylene blue (MB)	32/32	93	319.85
					Rhodamine B (RhB)	29/32	96	479
					Acid Fuchsin (AF)	25/32	99	585
					Evans Blue (EB)	26/32	99.5	960
					Acid red 94 (AR)	26/32	99.8	1018
					Crystal violet (CV)	----/----	97	407.98
					Safranin O (SO)	----/----	97	351
25	Scalable Fabrication of Nanoporous Multilayer Graphene Oxide Membrane for Organic Solvent Nanofiltration	Kim J, Kang J, Kim JP, Kim JY, Kim JH, Kwon O, Kim DW	Carbon 2023, 207, 162-71	Large-area nanoporous multilayer graphene oxide (NMG)	-----	…/1322	-----	-----
26	High-Performance Porous Graphene Oxide Hollow Fiber Membranes with Tailored Pore Sizes for Water Purification	Wu T, Moghadam F, Li K	Journal of Membrane Science 2022, 645, 120216	Hollow fiber (HF) porous GO (PGO) membranes	-----	…/0.12	-----	-----
27	Selective Molecular Sieving in Self-Standing Porous Covalent-Organic-Framework Membranes	S. Kandambeth, B. P. Biswal, H. D. Chaudhari, K. C. Rout, S. K. H., S. Mitra, S. Karak, A. Das, R. Mukherjee, U. K. Kharul, Ra.l Banerjee	Advanced Materials 2017, 29, 2, 1603945	COF (M-Tp-TD) (TD: 4,4′′-diamino-p-terphenyl)	-----	----/138	----	----
				COF (M-Tp-BD) (BD: benzidine)	-----	----/103	----	----
28	Selective Molecular Separation by Interfacially Crystallized Covalent Organic Framework Thin Films	K. Dey, M. Pal, K. C. Rout, S. Kunjattu H, A. Das, R. Mukherjee, U. K. Kharul, R. Banerjee	J. Am. Chem. Soc, 2017, 139, 37, 13083–13091	COF Tp-Bpy (Interfacially-crystallized thin films)	-----	----/108	----	----
29	Crystalline 2D Covalent Organic Framework Membranes for High-Flux Organic Solvent Nanofiltration	D.B. Shinde, G. Sheng, X. Li, M. Ostwal, A.-H. Emwas, K.-W. Huang, Z. Lai	J. Am. Chem. Soc, 2018, 140, 43, 14342–14349	COF crystalline membranes composed of TFP and DHF (COF-TFP-DHF) (number of deposited layer: 15)	-----	----/116	----	----
				COF-TFP-DHF) (number of deposited layer: 20)	-----	----/78	----	----
				COF-TFP-DHF) (number of deposited layer: 30)	-----	----/55	----	----
				COF-TFP-DHF) (number of deposited layer: 20)	Neutral red (NR)	----/----	6.2	229
					Safranine O (SO)	----/----	9.9	351
					Primuline (P)	----/----	9.9	453
					Amido black (AB)	----/----	17.3	616
					Congo red (CR)	----/----	77.2	696.6
					Reactive black (RB)	----/----	91.9	992
					vitamin B12 (V12)	----/----	96.5	1344
					Reactive green 19 (RG)	----/----	96.5	1419
30	Pore Engineering of Ultrathin CovalentOorganic Framework Membranes for Organic Solvent	D. B. Shinde, L. Cao, A. D. D. Wonanke, X. Li, S. Kumar, X. Liu, M. N. Hedhili, A. Emwas, M. Addicoat, K. Huang, Z. Lai	Chemical Science 2020, 11, 5434–5440	COF (TFP-DPF) crystalline ultrathin (38 nm)	-----	----/130	----	----
				COF (TFP-DPF) crystalline ultrathin (57 nm)	-----	----/77	----	----
				COF (TFP-DNF) crystalline ultrathin (40 nm)	-----	----/49	----	----
				COF (TFP-DNF) crystalline ultrathin (58 nm)	-----	----/37	----	----
				COF (TFP-DNF) crystalline ultrathin	Chrysoidine G (CG)	----/----	2	248
					Disperse red (DR)	----/----	9	314
					Crystal violet (CV)	----/----	20	407.98
					Protoporphyrin IX (PP)	----/----	84	562
					Direct black (DB)	----/----	91	781
					Reactive black (RB)	----/----	96	992
					Vitamin B12 (V-B12)	----/----	98	1344
					Reactive green 19 (RG)	----/----	100	1419
				COF (TFP-DPF) crystalline ultrathin	Chrysoidine G (CG)	----/----	1	248
					Disperse red (DR)	----/----	2	314
					Crystal violet (CV)	----/----	6	407.98
					Protoporphyrin IX (PP)	----/----	5.5	562
					Direct black (DB)	----/----	35	781
					Reactive black (RB)	----/----	72	992
					Vitamin B12 (V-B12)	----/----	96	1344
					Reactive green 19 (RG)	----/----	99.8	1419
31	A Two-Dimensional Cationic Covalent Organic Framework Membrane for Selective Molecular Sieving	W. Zhang, L. Zhang, H. Zhao, B. Li, H. Ma	J. Mater. Chem. A, 2018, 6, 1333	Cationic EB-COF:Br (189-μm-thick) on nylon 66	-----	----/1272	-----	-----
32	Laminated Self-standing Covalent Organic Framework Membrane with Uniformly Distributed Subnanopores for Ionic and Molecular Sieving	Y. Li, Q. Wu, X. Guo, M. Zhang, B. Chen, G. Wei, X. Li, X. Li, S. Li, L. Ma	Nature Communication 2020, 11, 559	COF synthesized with IP (FS-COM-1 with 0.6 nm pores)	-----	----/3.3	-----	-----
				COF synthesized with IP (FS-COM-2 with 1.1 nm pores)	-----	----/4.7	-----	-----
33**	Computational Design of 2D Covalent-Organic Framework Membranes for Organic Solvent Nanofiltration	Wan Wei, Jie Liu, Jianwen Jiang	ACS Sustainable Chem. Eng. 2019, 7, 1, 1734–1744	2D COF - TpPa-AM3	2,5-furandiamine (FDA)	---/789.45	98	98.1
				2D COF -TpPa-AMCOOH	2,5-furandiamine (FDA)	---/336.35	100	98.1
					Paracetamol (PRM)	---/336.35	100	151.163
					α-methylstyrene dimer (MSD)	---/336.35	100	236.4
				2D COF -TpPa-OBn	2,5-furandiamine (FDA)	1131.41/1356.19	75	98.1
					Paracetamol (PRM)	1094. 98/1356.19	100	151.163
					α-methylstyrene dimer (MSD)	1128.59/1356.19	89	236.4
				2D COF -TpPa-AMC2NH2	2,5-furandiamine (FDA)	925.38/1076.58	52.5	98.1
					Paracetamol (PRM)	931.01/1076.58	100	151.163
					α-methylstyrene dimer (MSD)	---/1076.58	93	236.4
				2D COF -TpPa-OC4H9	2,5-furandiamine (FDA)	---/1946.89	41	98.1
					Paracetamol (PRM)	---/1946.89	70	151.163
					α-methylstyrene dimer (MSD)	---/1946.89	66	236.4
				2D COF -TpPa-OC3OH	2,5-furandiamine (FDA)	---/2007.08	97.7	98.1
					Paracetamol (PRM)	---/2007.08	94	151.163
					α-methylstyrene dimer (MSD)	---/2007.08	100	236.4
					Nile red (NRD)	---/2007.08	100	318
				2D COF -TpPa-AM2	2,5-furandiamine (FDA)	---/2635.18	75	98.1
					Paracetamol (PRM)	---/2635.18	81	151.163
					α-methylstyrene dimer (MSD)	---/2635.18	66	236.4
					Nile red (NRD)	---/2635.18	100	318
34	Ultrastable Imine-based Covalent Organic Frameworks for Sulfuric Acid Recovery: An Effect of Interlayer Hydrogen Bonding	A. Halder, S.Karak, M.Addicoat, S. Bera, A. Chakraborty, S. H. Kunjattu, P. Pachfule, T. Heine, R.Banerjee	Angewandte Chemie International 2018, 57, 20, 5797-5802	COFM TpOMe-Azo (350 µm thickness)	-----	---/200	-----	-----
35	Nanoparticle Size-Fractionation through Self-Standing Porous Covalent Organic Framework Films	Kaushik Dey, Shebeeb Kunjattu H., Anurag M. Chahande, Rahul Banerjee	Angewandte Chemie International 2020, 59, 3, 1161-1165	Tp-Azo COF film (125 µm thickness)	-----	---/202.3	-----	-----
36	Self-Standing and Flexible Covalent Organic Framework (COF) Membranes for Molecular Separation	Jiangtao Liu, Gang Han, Dieling Zhao, Kangjia Lu, Jie Gao, Tai-Shung Chung	Chemical Review 2014, 114, 21, 10735–10806	TAPA-TFP on AAO (high polarity)	-----	.../241.9 ± 15.7	-----	-----
				TAPA-TFB on AAO (low polarity)	-----	…/57.3 ± 4.8	-----	-----
37	Mechanistic Study of pH Effect on Organic Solvent Nanofiltration Using Carboxylated Covalent Organic Framework as a Modeling and Experimental Platform	Phuoc H.H. Duong a, Yun Kyung Shin b, Valerie A. Kuehl, Mohammad M. Afroz, John O. Hoberg, Bruce Parkinson, Adri C.T. van Duin, Katie D. Li-Oakey	Separation and Purification Technology, 2022, 282, 120028	Carboxylated covalent organic framework(c-COF) (pH:7)	Alcian blue (AB)	..../2785	55.4	1298.86
					Neocyanine (NC)	..../2785	13.6	790
					Ethyl Violet (EV)	..../2785	5.72	492
					Safranin O (SO)	..../2785	2.48	351
				Carboxylated covalent organic framework(c-COF) (pH:2)	Alcian blue (AB)	..../2535	24.62	1298.86
					Neocyanine (NC)	..../2535	1.49	790
					Ethyl Violet (EV)	..../2535	1.49	492
					Safranin O (SO)	..../2535	1.24	351
				Carboxylated covalent organic framework(c-COF) (pH:10)	Alcian blue (AB)	..../1780	98.0	1298.86
					Neocyanine (NC)	..../1780	29.6	790
					Ethyl Violet (EV)	..../1780	22.1	492
					Safranin O (SO)	..../1780	12.1	351
38	Oriented Ionic Covalent Organic Framework Membranes for Efficient Organic Solvent Nanofiltration	Yuan J, You X, Zhang R, Yao Z, Liu Q, Cao L, Zhang S, Li Y, Liu Z, Jiang Z, Wu H.	Journal of Membrane Science 2023, 688, 122120	oi-COF	-----	.../125	-----	-----
39	Assembling Covalent Organic Framework Membranes via Phase Switching for Ultrafast Molecular Transport	Khan NA, Zhang R, Wang X, Cao L, Azad CS, Fan C, Yuan J, Long M, Wu H, Olson MA, Jiang Z	Nature communications 2022, 13(1), 3169	TFP–PDA COF membrane	-----	…/220	-----	-----
				TFP–TTA COF membrane	-----	…/175	-----	-----
40	Polyamide Covalent Organic Framework Membranes for Molecular Sieving	Lu Y, Zhou ZB, Qi QY, Yao J, Zhao X	ACS Applied Materials & Interfaces 2022, 14(32), 37019-37027	Imine-COF	-----	…/270	-----	-----
				Amide-COF	-----	…/235	-----	-----
				Amine-COF	-----	…/230	-----	-----
41	Tailored Pore Size and Microporosity of Covalent Organic Framework (COF) Membranes for Improved Molecular Seperation	Shinde DB, Cao L, Liu X, Wonanke DA, Zhou Z, Hedhili MN, Addicoat M, Huang KW, Lai Z	Journal of Membrane Science Letters 2021, 1(2), 100008	TFP-HETTA-39 nm thickness	-----	…/110	-----	-----
				TFP-HBTTA-41 nm thickness	-----	…/65	-----	-----
				TFP-HHTTA-48 nm thickness	-----	…/45	-----	-----
42	Ultrathin Lamellar MoS2 Membranes for Organic Solvent Nanofiltration	J. Ran, P. Zhang, C. Chu, P. Cui, X. Ai, T. Pan, Y. Wu, T. Xu	Journal of Membrane Science Letters 2020, 602, 117693	D-MoS2 (dry) on nylon MF via layer-by-layer stacking	-----	----/683	-----	-----
				S-MoS2 (solvated) on nylon MF via layer-by-layer stacking	-----	----/2423	-----	-----
43	Loosely Stacked Lamellar Membrane by Irregular MoS2 Flakes for Ultrahigh Water and Organics Permeation	X. Cui, Xi. Wu, J. Zhang, J. Wang, H. Zhang, F. Du, L. Qu, X. Cao, P. Zhang	J. Mater. Chem. A 2019, 7, 12698-12705	Loosely stacked MoS2 membrane with a thickness of 2.3 μm on nylon support	Methyl orange (MO)	3710/3790	50.8	327.33
					Metyhlene blue (MB)	3588/3790	58.5	319.85
					Crystal violet (CV)	3682/3790	70.2	407.98
					Reactive red (RR)	3532/3790	73.7	788
					acid yellow 14 (AY14)	3547/3790	91.7	449.2
					Reactive black (ReB)	3539/3790	94.6	992
					Acid yellow 79 (AY79)	3521/3790	99.8	1111
				Compactly stacked MoS2 membrane with a thickness of 1.5 μm on nylon support	Methyl orange (MO)	---/1657	63	327.33
					Metyhlene blue (MB)	---/1657	68.4	319.85
					Crystal violet (CV)	---/1657	77.7	407.98
					Reactive red (RR)	---/1657	79.7	788
					acid yellow 14 (AY14)	---/1657	93.6	449.2
					Reactive black (ReB)	---/1657	98.4	992
					Acid yellow 79 (AY79)	---/1657	99.9	1111
44	MoS2 Membranes for Organic Solvent Nanofiltration: Stability and Structural Control	Bing-Yi Guo, Shu-Dong Jiang, Ming-Jian Tang, Kerui Li, Shipeng Sun, Po-Yen Chen, Sui Zhan	J. Phys. Chem. Lett. 2019, 10, 4609−4617	As-prepared Hydro-MoS2 membranes (800 nm thick) on Torlon UF membrane prepared at 5 bar	-----	---/273	-----	-----
				As-prepared Hydro-MoS2 membranes (400 nm thick) on Torlon UF membrane prepared at 5 bar	-----	---/342	-----	-----
				As-prepared Chem-MoS2 membranes (500 nm thick) on Torlon UF membrane prepared at 5 bar	-----	---/8	-----	-----
				Hydro-MoS2 membrane (700 nm thick) dried for 30 min during the glycerol-supported drying proces	-----	---/8.7	-----	-----
45	In-situ Growth of Graphene Quantum Dots Modified MoS2 Membrane on Tubular Ceramic Substrate with High Permeability for Both Water and Organic Solvent	Yue Liu, Zhenping Qin, Xuehong Zhang, Naixin Wang, Tongtong Liu, Suping Cui, Quan-Fu An, Hongxia Guo	Journal of Membrane Science 2021, 627, 119247	MoS2 without GQDs membrane on ceramic substrate	Evans Blue (EB)	20.2/--	97.2	960.8 g/mol
46**	Single-Layer Membranes for Organic Solvent Nanofiltration: A Molecular Dynamics Simulation and Comparative Experimental Study	Xuejian Lia, Yue Liu, Qiaohong Liu, Zilong Zheng and Hongxia Guo	RSC Advances 2022, 12, 7189	MoS2 having 0.6 nm pore functionalized with S atoms	Acetaminophen	31/..	100	151
				MoS2 having 0.7 nm pore functionalized with Mo atoms	Acetaminophen	17/...	100	151
				MoS2 having 1.3 nm pore functionalized with S atoms	Acetaminophen	158/...	91	151
				MoS2 having 1.4 nm pore functionalized with Mo atoms	Acetaminophen	202/...	87	151
47	In-Situ Growth of a Tubular MoS2 Membrane on a Ceramic Tube With Improved Organic Solvent Nanofiltration Performance	Tongtong Liu, Zhenping Qin, Qiaohong Liu, Xuejian Li, Yue Liu, Quan-Fu An and Hongxia Guo	Mater. Chem. Front., 2021, 5, 3184-3191	MoS2	Evans Blue (EB)	41/...	90	960
48	Functionalized Boron Nitride Membranes With Ultrafast Solvent Transport Performance for Molecular Separation	Cheng Chen, Jiemin Wang, Dan Liu, Chen Yang, Yuchen Liu, Rodney S. Ruoff, Weiwei Lei	Nature Communication 2018, 9, 1902	FBN-0.4 on nylon UF (with 0.4 μm thickness)	-----	----/5005	-----	-----
				FBN-2 on nylon UF (with 2 μm thickness)	Metyhlene blue (MB)	740/1430	60	319.85
					Acid Fuchsin (AF)	640/1430	88.7	585.53
					Congo red (CR)	600/1430	>99	696.6
					Evans Blue (EB)	560/1430	>99	960.8
				FBN-8 on nylon UF (with 8 μm thickness)	Metyhlene blue (MB)	240/456	93	319.85
49	Charged Boron Nitride Nanosheet Membranes for Improved Organic Solvent Nanofiltration	Xu M, Tang Q, Liu Y, Shi J, Zhang W, Guo C, Liu Q, Lei W, Chen C	ACS Applied Materials & Interfaces 2023, 15(9), 12524-33	PBN-3	Methyl orange (MO)	.../568	98.45	327
				PBN-4	Acid Fuchsin (AF)	.../568	98.85	585
				SBN-3	Azure B (AB)	.../753	92.18	305.8
50	Ultrafast Viscous Permeation of Organic Solvents Through Diamond-Like Carbon Nanosheets	Santanu Karan, Sadaki Samitsu, Xinsheng Peng, Keiji Kurashima, Izumi Ichinose	Science 2012, 335, 6067, 444-447	Free-standing DLC membranes - acetylene membranes deposited at 10 W-35 nm	------	----/218.4 (at 80 kPa)	------	------
				Free-standing DLC membranes - acetylene membranes deposited at 50 W-10 nm	------	----/1764 (at 80 kPa)	------	------
				Free-standing DLC membranes - hexamethyldisiloxane membrane deposited at 50 W-35 nm	------	----/87.4 (at 80 kPa)	------	------
				Free-standing DLC membranes - allyltrimethoxysilane membrane deposited at 50 W-36 nm	------	----/67.9 (at 80 kPa)	------	------
51	A Two-Dimensional Lamellar Vermiculite Membrane for Precise Molecular Separation and Ion Sieving	Tian M, Wang L, Wang J, Zheng S, Wang F, Shao N, Wang L	ACS Sustainable Chemistry & Engineering 2022, 10(3), 1137-48	2D vermiculite (VMT) nanomaterials	Orang G (OG)	24/37	100	452.37
					Rhodamine B (RhB)	14/37	100	479.01
					Congo Red (CR)	22/37	100	696.68
					Methyl blue (MlB)	21/37	100	799.8
					Evans Blue (EB)	30/37	99.7	960.89
				VMT intercalated with Fe(OH)3	Evans Blue (EB)	490/..	99.7	960.89
52	Bottom-up Synthesis of Two-Dimensional Carbon with Vertically Aligned Ordered Micropores for Ultrafast Nanofiltration	Kim C, Koh DY, Lee Y, Choi J, Cho HS, Choi M	Science advances 2023, 9(6), eade7871	Partially oxidized 2D zeolite-templated carbons (o-2DZTC)	Styrene Oligomers with varying Mw range	…/930	8	159
					-----	----/----	40	263
					-----	----/----	93	370
					-----	----/----	96	473
					-----	----/----	94	576
					-----	----/----	98	680
					-----	----/----	96	785
					-----	----/----	97	890
					-----	----/----	98	992
					-----	----/----	99	1096
19	Laminar HNb3O8-based Membranes Supported on Anodic Aluminum Oxide with Enhanced Anti-swelling Property for Organic Solvent Nanofiltration	K. Nakagawa, M. Kunimatsu, K. Yasui, T. Yoshioka, T. Shintani, E. Kamio, K.-L. Tung, S. C. E. Tsang, H. Matsuyama	Journal of Membrane Science, 2021, 640, 119799	HNb3O8/AAO	Acid red 265 (AR265)	.../5.5	18	635.6
				HNb3O8/AAO	Evans Blue (EB)	.../5.5	87	960
53	Nickel Hydroxide Nanosheet Membranes with Fast Water and Organics Transport for Molecular Separation	Y. Qu, Q. G. Zhang, F. Soyekwo, R. Sh. Gao, R. X. Lv, C. X. Lin, M. M. Chen, A. M. Zhu, Q. L. Liu	Nanoscale 2016,8, 18428-18435	Nickel hydroxide nanosheet-based membrane with 1.13 μm-thick on AAO support	-----	--/227	-----	-----
54	ZIF-8 Channelled and Coordination-Bridging Two-Dimensional WS2 Membrane for Efficient Organic Solvent Nanofiltration	Wu SC, Chen Y, Yan X, Guo XJ, Lang WZ	Chemical Engineering Journal 2022, 442, 136139	Hydrated WS2	-----	.../750	-----	-----
2	Two-dimensional Graphene Oxide/MXene Composite Lamellar Membranes for Efficient Solvent Permeation and Molecular Separation	S. Wei, Y. Xie, Y. Xing, L. Wang, H. Ye, X. Xiong, S. Wang, K. Han	Journal of Membrane Science 2019, 582, 414–422	GO/MXene (70wt.%) on nylon support with thickness of 140 nm	Methylene blue (MB)	20/25.03	50	319.85
					Methyl orange (MO)	20/----	25	327.33
					Acid yellow 14 (AY14)	19/----	50	449.2
					Eosin (E)	18/----	58	691.9
				GO/MXene (80wt.%) on nylon support	Methylene blue (MB)	43/51	30	319.85
55	Hybrid 2D WS2/GO Nanofiltration Membranes for Finely Molecular Sieving	Peng Cheng, Yan Chen, Yi-Hang Gu, Xi Yan, Wan-Zhong Lang	Journal of Membrane Science 2019, 591, 117308	150 nm-thick GO (15%) /WS2 membrane on nylon support	-----	---/297	-----	-----
5	Enhancing Interfacial Adhesion of MXene Nanofiltration Membranes via Pillaring Carbon Nanotubes for Pressure and Solvent Stable Molecular Sieving	D.-D. Shao, Q. Zhang, L. Wang, Z.-Y. Wang, Y.-X. Jing, X.-L. Cao, F. Zhang, S.-P. Sun	Journal of Membrane Science 2021, 626,119033	MXene/CNTs-CTAB (2:2) membranes	-----	…./115	-----	-----
45	In-situ Growth of Graphene Quantum Dots Modified MoS2 Membrane on Tubular Ceramic Substrate with High Permeability for Both Water and Organic Solvent	Yue Liu, Zhenping Qin, Xuehong Zhang, Naixin Wang, Tongtong Liu, Suping Cui, Quan-Fu An, Hongxia Guo	Journal of Membrane Science 2021, 627, 119247	M/G-1 composite on ceramic substrate (3.2 wt% GQDs)	Evans Blue (EB)	52.5/--	94.7	960.8 g/mol
				M/G-2 composite on ceramic substrate (4.5 wt% GQDs)	Evans Blue (EB)	78.0/--	92.4	960.8 g/mol
				M/G-3 composite on ceramic substrate (6.3 wt% GQDs)	Evans Blue (EB)	94.5/--	81	960.8 g/mol
16	Leaf-veins-inspired Nickel Phosphate Nanotubes-Reduced Graphene Oxide Composite Membranes for Ultrafast Organic Solvent Nanofiltration	L. Zhang, J.Wang, Y. Zhang, J. Zhu, J. Yang, J. Wang, Y. Zhang, Y. Wang	Journal of Membrane Science 2022, 649, 120401	Nickel phosphate nanotubes-reduced graphene oxide (NPTs-rGO)-850 nm thickness	Reactive black (ReB)	.../670	98.2	992
					Direct red (DR)	.../670	97	814
17	The Tripartite Role of 2D Covalent Organic Frameworks in Graphene-based Organic Solvent Nanofiltration Membranes	Xiao Sui, Yu Wang, Fei Liu, Ziwen Yuan, Cheng Wang, Yanxi Yu, Kun Zhou, Kunli Goh, Yuan Chen	Matter 2021, 4, 2953–2969	COF-rGO (30% COF loading)	Brilliant blue G (BBG)	.../74.5	95.6	854
					Rhodamine B (RhB)	.../74.5	84.5	479
					Rose Bengal (RoB)	.../74.5	89.4	1018
					Methylene blue (MB)	.../74.5	80.6	320
					Acid orange 7 (AO7)	.../74.5	76	350
19	Laminar HNb3O8-based Membranes Supported on Anodic Aluminum Oxide with Enhanced Anti-swelling Property for Organic Solvent Nanofiltration	K. Nakagawa, M. Kunimatsu, K. Yasui, T. Yoshioka, T. Shintani, E. Kamio, K.-L. Tung, S. C. E. Tsang, H. Matsuyama	Journal of Membrane Science, 2021, 640, 119799	Mixed GO–HNb3O8/AAO	Acid red 265 (AR265)	.../19	20	635.6
					Evans Blue (EB)	.../19	25	960
				Layered GO–HNb3O8/AAO	Acid red 265 (AR265)	.../3.7	72	635.6
					Evans Blue (EB)	.../3.7	89	960
54	ZIF-8 Channelled and Coordination-Bridging Two-Dimensional WS2 Membrane for Efficient Organic Solvent Nanofiltration	Wu SC, Chen Y, Yan X, Guo XJ, Lang WZ	Chemical Engineering Journal 2022, 442, 136139	ZIF-8/WS2	-----	.../1150	-----	-----
56	Hyperlooping Carbon Nanotube-Graphene Oxide Nanoarchitectonics as Membranes for Ultrafast Organic Solvent Nanofiltration	Nie L, Goh K, Wang Y, Velioglu S, Huang Y, Dou S, Wan Y, Zhou K, Bae TH, Lee JM	ACS Materials Letters 202, ;5(2), 357-69	MWCNTs intercalated within La3+ and cross-linked small-flake graphene oxide (SFGO) (GO-MWCNTs-La3+)	-----	…/150	-----	-----
				MWCNTs intercalated within La3+ and cross-linked large-flake graphene oxide (SFGO) (GO-MWCNTs-La3+)	-----	…/64	-----	-----
57	Advanced Hybrid Nanosheet Membranes with Stable Nanochannels for Ultrafast Molecular Separation	Guo Q, Xu M, Tang Q, Liu Y, Zhang W, Guo C, Zhao X, Zhu Y, Ye S, Liu D, Lei W	NPJ Clean Water 2023, 6(1), 38	GO-BN membrane with a mass density of 69 mg/m2	Acid fusion (AF)	880/1100	87	585
					Evans Blue (EB)	780/1100	99	960.8
58	Heterostructured MoS2 Quantum Dot/GO Lamellar Membrane with Improved Transport Efficiency for Organic Solvents Inspired by the Namib Desert Beetle	Wang A, Chen W, Xu H, Xie Z, Zheng X, Liu M, Wang Y, Geng N, Mu X, Ding M	Journal of Membrane Science 2022, 650, 120402	MoS2 quantum dot/GO lamellar membrane	Rose Bengal (RoB)	…/22.83	87.67	1018
					Remazol brilliant blue R	----/----	86.03	627
					Methyl orange (MO)	----/----	50.97	327
59	Functionalised Graphene Oxide-based Nanofiltration Membranes with Enhanced Molecular Separation Performance	Sharif S, Ahmad KS, Memon FH, Rehman F, Soomro F, Thebo KH	Materials Research Innovations 2022, 26(6), 373-81	GO/Ag NPs functionalised membranes	Methylene blue (MB)	…/525	96	319.85
					Crystal violet (CV)	----/----	97	407.98
					Safranin O (SO)	----/----	97	351
60	2D-Dual-Spacing Channel Membranes for High Performance Organic Solvent Nanofiltration	S. Wang, D. Mahalingam, B. Sutisna, S. P. Nunes	J. Mater. Chem. A, 2019, 7, 11673-11682	Dual-spacing channel GO with Si - GO-Si2 (with NaOH filtration)	Methyl orange (MO)	----/306	53.3	327.33
					Indigo carmine (IC)	----/306	75	466.36
					Congo red (CR)	----/306	96	696.6
					Brilliant blue R250 (BB)	----/306	99.3	792.85
					Rose bengal (RB)	----/306	92.8	1017.6
					Chrysoidine G (CG)	----/306	23.5	248
					Methylene blue (MB)	----/306	46	319.85
					Crystal violet (CV)	----/306	66.3	407.98

## Sheet: Table S2
Table S2. The ratio of pure methanol permeance (PMP) over pure water permeance (PWP) of free-standing 2D nanolaminate membranes
Free standing 2D nanolaminate membrane	Pure Solvent Permeance (LMH×bar−1)		Ratio PMP/PWP
	Methanol (PMP)	Water (PWP)
Small-flake graphene oxide (SFGO) cross-linked with La3+	120	35	3.42857
Large-flake graphene oxide (LFGO) cross-linked with La3+	45	30	1.5
Large-flake graphene oxide (LFGO) cross-linked with Co3+	12	28	0.428571
Large-flake graphene oxide (LFGO) uncross-linked	12	25	0.48
MXene (Ti3C2Tx) on PDA support with thichness of 230 nm	3563	2315	1.53909
MXene (Ti3C2Tx) on PDA support with thichness of 470 nm	2000	1073	1.86393
COF (M-Tp-TD) (TD: 4,4′′-diamino-p-terphenyl)	142	117.6	1.20748
COF (M-Tp-BD) (BD: benzidine)	106.3	91.6	1.16048
COF Tp-Bpy (Interfacially-crystallized thin films)	108	211	0.511848
GO membrane with mass loading of 120 mg/m2 (thickness 140 nm)	0.2	8	0.025
MXene membrane with mass loading of 120 mg/m2 (thickness 140 nm)	1900	1600	1.1875
GO-MXene (50% MXene, 140 nm)	10.7	13.4	0.798507
GO-MXene (60% MXene, 140 nm)	19.6	17.5	1.12
GO-MXene (70% MXene, 140 nm)	25.2	22.4	1.125
GO-MXene (80% MXene, 140 nm)	54.2	46.2	1.17316
COF crystalline membrane (LB method with precursors TFP DHF) M20	78	61	1.27869
COF (TFP-DPF) crystalline ultrathin (38 nm)	130	161	0.807453
COF (TFP-DPF) crystalline ultrathin (57 nm)	77	104	0.740385
COF (TFP-DNF) crystalline ultrathin (40 nm)	49	81	0.604938
COF (TFP-DNF) crystalline ultrathin (58 nm)	37	49	0.755102
S-rGO-18 on nylon support (solvent solvated reduced GO)	78	92	0.847826
Cationic EB-COF:Br (189-μm-thick) on nylon 66	1272	546	2.32967
HLGO (highly laminated large flake) on anodisc alumina support	9.6	4.3	2.23256
D-MoS2 (dry) on nylon MF via layer-by-layer stacking	683	495	1.3798
S-MoS2 (solvated) on nylon MF via layer-by-layer stacking	2423	1945	1.24576
Layer-stacked GO membrane on nylon support	3.5	15	0.233333
Dual-spacing channel GO with Si-GO-Si2 (with NaOH filtration)	306	229	1.33624
COF synthesized with IP (FS-COM-1 with 0.6 nm pores)	3.3	3.9	0.846154
COF synthesized with IP (FS-COM-2 with 1.1 nm pores)	4.7	10.1	0.465347
rGO-44 (44 mg/m2) on nylon or AAO MF membrane	1.62	3.68	0.440217
rGO-TMPyP0.6-44 (weight ratio of TMPyP to rGO:0.6)	5.26	9.5	0.553684
shear-aligned Nylon support GO membrane with 350±20 nm thickness	108	28	3.85714
Crumpled Ti3C2Tx (c-Ti3C2Tx) membrane with a mass loading of 0.1 mg/cm2	2484	2331	1.06564
Ti3C2Tx membrane with a mass loading of 0.1 mg/cm2	121	166	0.728916
Crumpled Ti3C2Tx (c-Ti3C2Tx) membrane with a mass loading of 0.25 mg/cm2	1089	726	1.5
Ti3C2Tx membrane with a mass loading of 0.25 mg/cm2	32	102	0.313725
FBN-0.4 on nylon UF (with 0.4 μm thickness)	505	2751	0.18357
Loosely stacked MoS2 membrane with thickness of 2.3 μm on nylon support	3790	1430	2.65035
Compactly stacked MoS2 membrane with thickness of 1.5 μm on nylon support	1657	610	2.71639
Ti3C2Tx on nylon support	3029	1588	1.90743
Ti3C2Tx-NH2 on nylon support	2328	1270	1.83307
GO hollow fiber membranes on ceramic substrate 1.5 μm thick - fresh	3.97	1.04	3.81731
GO-WS2 membrane with a 150 nm-thick on nylon support	297	267	1.11236
As-prepared hydro-MoS2 membranes (800 nm thick) on Torlon UF membrane	273	137	1.9927
As-prepared hydro-MoS2 membranes (400 nm thick) on Torlon UF membrane	342	196	1.7449
As-prepared chem-MoS2 membranes (500 nm thick) on Torlon UF membrane	8	11	0.727273
Hydro-MoS2 membrane (700 nm thick) dried for 30 min during the glycerol-supported drying process	8.7	6.6	1.31818
COFM TpOMe-Azo (350 µm thickness)	200	170	1.17647
Tp-Azo COF film (125 µm thickness)	202.3	88	2.29886
MXene/CNTs-CTAB (2:2) membranes	115	99.6	1.15462
MXene	28	23.1	1.21212
TAPA-TFP on AAO (high polarity)	241.9	148.2	1.63225
TAPA-TFB on AAO (low polarity)	57.3	36.7	1.56131
Nickel phosphate nanotubes-reduced graphene oxide (NPTs-rGO)-850 nm thickness	670	498	1.34538
GO	1.35	0.3	4.5
Hydrothermal GO	3	0.92	3.26087
Hydrated WS2	750	492	1.52439
ZIF-8/WS2	1150	761	1.51117
PBN-3	270	146	1.84932
SBN-3	424	135	3.14074
Holey graphene multi-functionalized with SiO2 nanoparticles (HG-SiO2)	299	225	1.32889
Microwave-treated nanoporous graphene membrane (MNG)	5800	758	7.65172
Multiwalled carbon nanotubes (MWCNTs) intercalated within lanthanum(III) (La3+)-cross-linked small-flake graphene oxide (SFGO) (GO-MWCNTs-La3+)	295	91	3.24176
GO-DMSO	74	70.5	1.04965
GO-NMF	52	52	1
GO-DMF	32	30.7	1.04235
GO/Ag NPs functionalised membranes	525	1032	0.508721
Graphene oxide-boron nitride (GO-BN)- the mass density of 69 mg/m2	1100	1610	0.68323
Partially oxidized 2D zeolite-templated carbons (o-2DZTC)	940	620	1.51613
Large-area nanoporous multilayer graphene oxide (NMG)	1340	101	13.2673
Imine-COF	276	530	0.520755
Amide-COF	232	489	0.474438
Amine-COF	227	345	0.657971
TFP-HETTA-39 nm thickness	6	4.5	1.33333
TFP-HBTTA-41 nm thickness	4.3	2.9	1.48276
TFP-HHTTA-48 nm thickness	3	1.9	1.57895
2D vermiculite (VMT) nanomaterials	36	25	1.44
